# Supplementary material for: The slow de‐implementation of non‐evidence‐based treatments in low back pain hospital care—Trends in treatments using Dutch hospital register data from 1991 to 2018
Source: PubMed Central journal article supplement (PMC10099564; doi:10.1002/ejp.2052), 2022-11-12

Supplementary file 6. Descriptive information of the assessed low back pain (LBP) treatments.

Table depicting both absolute numbers and relative number (per 100,000 inhabitants) of all selected low back pain treatment

|                                                                          | Bed rest for non-specific LBP |     |      | Bed rest for hernia nuclei pulposi |     |       | Discectomy for spinal stenosi |     |       | Spinal fusion |     |     | Invasive pain treatment |     |      |
|--------------------------------------------------------------------------|-------------------------------|-----|------|------------------------------------|-----|-------|-------------------------------|-----|-------|---------------|-----|-----|-------------------------|-----|------|
|                                                                          | n                             | %   | N    | n                                  | %   | N     | n                             | %   | N     | n             | %   | N   | n                       | %   | N    |
| Total (1991-2018)                                                        | 133,631                       |     | 37.6 | 393,790                            |     | 110.8 | 218,635                       |     | 61.5  | 18,051        |     | 1.7 | 77,259                  |     | 7.2  |
| Males                                                                    | 56,936                        | 43% | 32.7 | 216,628                            | 55% | 124.3 | 122,610                       | 56% | 70.3  | 7,265         | 40% | 1.4 | 27,809                  | 36% | 5.3  |
| Females                                                                  | 76,695                        | 57% | 42.3 | 177,162                            | 45% | 97.8  | 96,025                        | 44% | 53.0  | 10,786        | 60% | 2.0 | 49,450                  | 64% | 9.1  |
| 18-25                                                                    | 6,254                         | 5%  | 15.5 | 17,297                             | 4%  | 42.7  | 10,109                        | 5%  | 25.0  | 390           | 2%  | 0.3 | 600                     | 1%  | 0.5  |
| 25-29                                                                    | 6,022                         | 5%  | 19.2 | 20,264                             | 5%  | 64.6  | 11,929                        | 5%  | 38.0  | 565           | 3%  | 0.6 | 891                     | 1%  | 1.0  |
| 30-34                                                                    | 10,656                        | 8%  | 32.6 | 42,248                             | 11% | 129.2 | 25,347                        | 12% | 77.5  | 1,173         | 6%  | 1.2 | 2,156                   | 3%  | 2.2  |
| 35-39                                                                    | 13,800                        | 10% | 41.2 | 55,293                             | 14% | 165.0 | 32,975                        | 15% | 98.4  | 2,041         | 11% | 2.0 | 3,955                   | 5%  | 3.9  |
| 40-44                                                                    | 16,015                        | 12% | 46.9 | 58,781                             | 15% | 172.3 | 34,158                        | 16% | 100.1 | 2,595         | 14% | 2.5 | 6,397                   | 8%  | 6.3  |
| 45-49                                                                    | 15,769                        | 12% | 47.1 | 53,682                             | 14% | 160.2 | 30,629                        | 14% | 91.4  | 2,611         | 14% | 2.6 | 8,520                   | 11% | 8.5  |
| 50-54                                                                    | 13,634                        | 10% | 44.3 | 42,233                             | 11% | 137.1 | 23,436                        | 11% | 76.1  | 2,123         | 12% | 2.3 | 9,545                   | 12% | 10.3 |
| 55-59                                                                    | 10,972                        | 8%  | 39.9 | 32,501                             | 8%  | 118.2 | 17,340                        | 8%  | 63.1  | 1,755         | 10% | 2.1 | 9,554                   | 12% | 11.6 |
| 60-64                                                                    | 9,231                         | 7%  | 38.1 | 24,364                             | 6%  | 100.5 | 12,242                        | 6%  | 50.5  | 1,399         | 8%  | 1.9 | 8,091                   | 10% | 11.1 |
| 65-69                                                                    | 8,541                         | 6%  | 40.9 | 19,308                             | 5%  | 92.4  | 9,106                         | 4%  | 43.6  | 1,281         | 7%  | 2.0 | 7,881                   | 10% | 12.6 |
| 70-74                                                                    | 7,771                         | 6%  | 45.8 | 14,264                             | 4%  | 84.1  | 6,314                         | 3%  | 37.3  | 1,144         | 6%  | 2.3 | 7,654                   | 10% | 15.1 |
| 75-79                                                                    | 6,858                         | 5%  | 52.5 | 8,756                              | 2%  | 67.0  | 3,593                         | 2%  | 27.5  | 673           | 4%  | 1.7 | 6,434                   | 8%  | 16.4 |
| 80-84                                                                    | 4,842                         | 4%  | 53.5 | 3,694                              | 1%  | 40.8  | 1,184                         | 1%  | 13.1  | 257           | 1%  | 1.0 | 4,006                   | 5%  | 14.8 |
| 85+                                                                      | 3,266                         | 2%  | 44.6 | 1,105                              | 0%  | 15.1  | 273                           | 0%  | 3.7   | 44            | 0%  | 0.2 | 1,575                   | 2%  | 7.2  |
| n = Absolute number of low back pain treatments                          |                               |     |      |                                    |     |       |                               |     |       |               |     |     |                         |     |      |
| N = Relative number of low back pain treatment (per 100,000 inhabitants) |                               |     |      |                                    |     |       |                               |     |       |               |     |     |                         |     |      |

Figure depicting the use of relative low back pain treatments (per 100,000 inhabitants), stratified by sex (upper panel) and age category (lower panel).

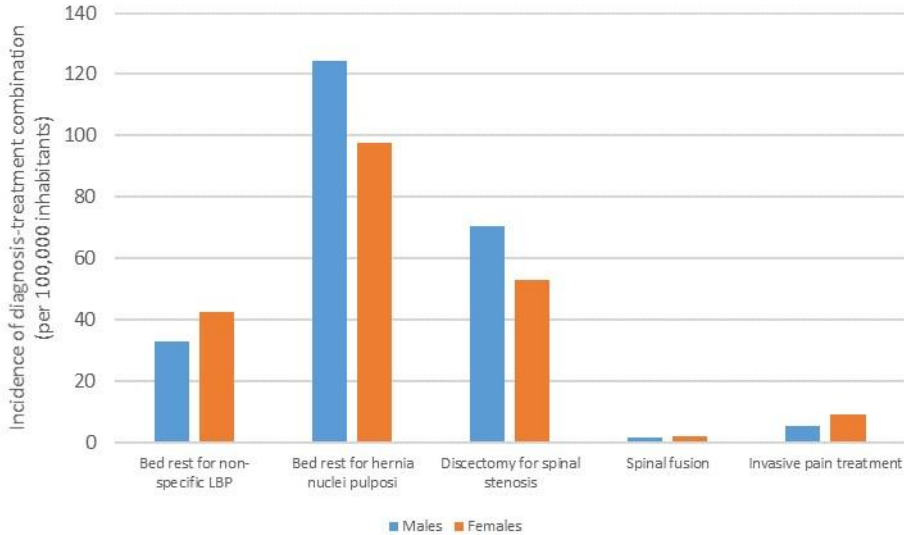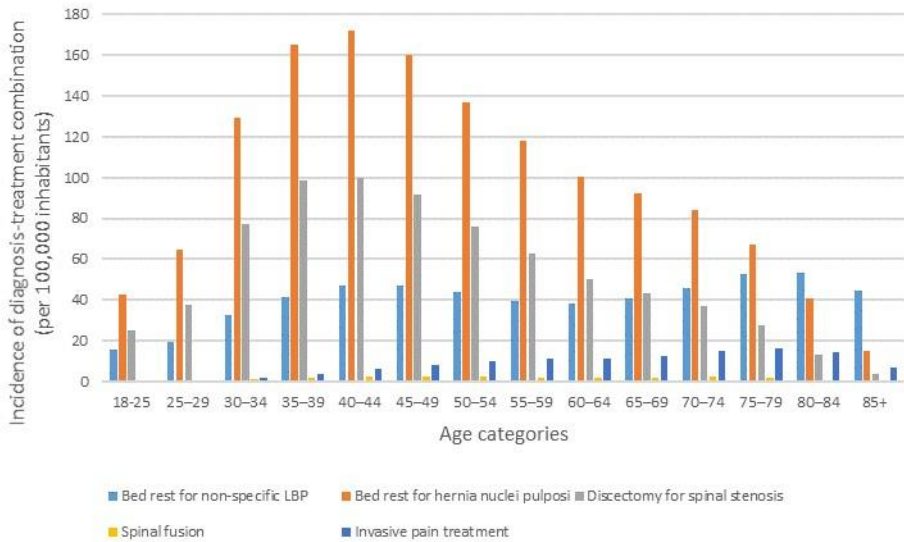

Supplement: EJP-27-212-s005.pdf [file EJP-27-212-s005.pdf]
