# Supplementary material for: The slow de‐implementation of non‐evidence‐based treatments in low back pain hospital care—Trends in treatments using Dutch hospital register data from 1991 to 2018
Source: PubMed Central journal article supplement (PMC10099564; doi:10.1002/ejp.2052), 2022-11-12
Supplement: EJP-27-212-s001.pdf [file EJP-27-212-s001.pdf]

Supplementary file 3. Overview of incompleteness of the data for the variable 'hospital admissions'

| <b>Year</b> | <b>% incomplete</b> |
|-------------|---------------------|
| 1991        | 0.6                 |
| 1992        | 0.7                 |
| 1993        | 0.7                 |
| 1994        | 0.7                 |
| 1995        | 0.8                 |
| 1996        | 0.8                 |
| 1997        | 0.6                 |
| 1998        | 0.7                 |
| 1999        | 0.5                 |
| 2000        | 0.8                 |
| 2001        | 0.8                 |
| 2002        | 0.3                 |
| 2003        | 0.5                 |
| 2004        | 1.1                 |
| 2005        | 2.9                 |
| 2006        | 8.9                 |
| 2007        | 10.9                |
| 2008        | 11.7                |
| 2009        | 12.0                |
| 2010        | 10.9                |
| 2011        | 15.1                |
| 2012        | 18.0                |
| 2013        | 15.7                |
| 2014        | 1.2                 |
| 2015        | 0.3                 |
| 2016        | 0.0                 |
| 2017        | 0.0                 |
| 2018        | 0.0                 |
| 2019        | 0.0                 |
