# Supplementary material for: The slow de‐implementation of non‐evidence‐based treatments in low back pain hospital care—Trends in treatments using Dutch hospital register data from 1991 to 2018
Source: PubMed Central journal article supplement (PMC10099564; doi:10.1002/ejp.2052), 2022-11-12
Supplement: EJP-27-212-s002.pdf [file EJP-27-212-s002.pdf]

Supplementary file 4. Specification of ICD 9 and 10 codes that are included in the four low back pain category

| Low back pain category         | ICD-9  | ICD-10 |
|--------------------------------|--------|--------|
| Non-specific low back pain     | 722.30 | M51.4  |
| Non-specific low back pain     | 722.31 | M51.4  |
| Non-specific low back pain     | 722.32 | M51.4  |
| Non-specific low back pain     | 722.39 | M51.4  |
| Non-specific low back pain     | 724.2  | M54.56 |
| Non-specific low back pain     | 724.3  | M54.39 |
| Non-specific low back pain     | 724.4  | M54.19 |
| Non-specific low back pain     | 724.5  | M54.99 |
| Non-specific low back pain     | 724.6  | M53.88 |
| Non-specific low back pain     | 724.8  | M54.89 |
| Non-specific low back pain     | 724.9  | M53.99 |
| Non-specific low back pain     | 739.3  | M99.03 |
| Non-specific low back pain     | 739.4  | M99.04 |
| Degenerative low back problems | 721.3  | M47.87 |
| Degenerative low back problems | 721.5  | M48.29 |
| Degenerative low back problems | 721.6  | M48.19 |
| Degenerative low back problems | 721.7  | M48.39 |
| Degenerative low back problems | 721.8  | M48.89 |
| Degenerative low back problems | 721.90 | M47.99 |
| Degenerative low back problems | 721.91 | M47.19 |
| Degenerative low back problems | 722.6  | M51.3  |
| Degenerative low back problems | 722.90 | M51.9  |
| Degenerative low back problems | 722.91 | M50.9  |
| Degenerative low back problems | 722.92 | M51.9  |
| Degenerative low back problems | 722.93 | M51.9  |
| Lumbar spinal stenosis         | 721.41 | M47.14 |
| Lumbar spinal stenosis         | 721.42 | M47.16 |
| Lumbar spinal stenosis         | 724.00 | M48.09 |
| Lumbar spinal stenosis         | 724.01 | M48.04 |
| Lumbar spinal stenosis         | 724.02 | M48.06 |
| Lumbar spinal stenosis         | 724.09 | M48.08 |
| Hernia nuclei pulposi          | 722.10 | M51.2  |
| Hernia nuclei pulposi          | 722.11 | M51.2  |
| Hernia nuclei pulposi          | 722.2  | M51.2  |
| Hernia nuclei pulposi          | 722.70 | M51.0  |
| Hernia nuclei pulposi          | 722.71 | M50.0  |
| Hernia nuclei pulposi          | 722.72 | M51.0  |
| Hernia nuclei pulposi          | 722.73 | M51.0  |
