# Supplementary material for: The slow de‐implementation of non‐evidence‐based treatments in low back pain hospital care—Trends in treatments using Dutch hospital register data from 1991 to 2018
Source: PubMed Central journal article supplement (PMC10099564; doi:10.1002/ejp.2052), 2022-11-12
Supplement: EJP-27-212-s003.pdf [file EJP-27-212-s003.pdf]

Supplementary file 7. Percentage (%) of de-implementation during the study period and, if at all, time until successful de-implementation (using a 84% threshold). De-implementation with the first year of study (1991) as reference and with the first landmark publication (see Supplementary file 2) as reference are reported.

| Treatments                         | De-implementation with 1991 as reference |                                         | De-implementation with first landmark as reference |                     |                                         |
|------------------------------------|------------------------------------------|-----------------------------------------|----------------------------------------------------|---------------------|-----------------------------------------|
|                                    | % de-implementation                      | Time until successful de-implementation | First landmark                                     | % de-implementation | Time until successful de-implementation |
| Bed rest for non-specific LBP      | 94%                                      | 23 year                                 | 1996                                               | 91%                 | 18 year                                 |
| Bed rest for hernia nuclei pulposi | 83%                                      | Not                                     | 1995                                               | 81%                 | Not                                     |
| Discectomy for spinal stenosis     | 89%                                      | 25 years                                | 2000                                               | 86%                 | 17 years                                |
| Spinal fusion                      | 78%                                      | Not                                     | 2000                                               | 85%                 | 19 years                                |
| Invasive pain treatment            | 35%                                      | Not                                     | 1999                                               | 75%                 | Not                                     |
