# Supplementary material for: The slow de‐implementation of non‐evidence‐based treatments in low back pain hospital care—Trends in treatments using Dutch hospital register data from 1991 to 2018
Source: PubMed Central journal article supplement (PMC10099564; doi:10.1002/ejp.2052), 2022-11-12
Supplement: EJP-27-212-s007.pdf [file EJP-27-212-s007.pdf]

Supplementary file 5. Specification of treatments codes (in Dutch: Classificatie van Verrichtingen; CVV) from the operations thesaurus that are included in the four low back pain categories.

| <b>Low back treatments</b>        | <b>CVV group</b> | <b>CVV code</b> | <b>Description (Dutch)</b>                                                | <b>Description (English)</b>                                            |
|-----------------------------------|------------------|-----------------|---------------------------------------------------------------------------|-------------------------------------------------------------------------|
| Discectomy incl. chemonucleolysis | 5803             | 5803            | Excisie en destructie van discus intervertebralis                         | Excision and destruction of the discus intervertebralis                 |
| Discectomy incl. chemonucleolysis | 5803             | 58030           | Chemonucleolyse en thermolaesie                                           | Chemonucleolysis and thermolysis                                        |
| Discectomy incl. chemonucleolysis | 5803             | 580300          | Chemonucleolyse of thermolaesie, nno                                      | Chemonucleolysis or thermolysis, not specified                          |
| Discectomy incl. chemonucleolysis | 5803             | 580301          | Chemonucleolyse of thermolaesie, cervicaal                                | chemonucleolysis or thermolysis, cervical                               |
| Discectomy incl. chemonucleolysis | 5803             | 580302          | Chemonucleolyse of thermolaesie, thoracaal                                | chemonucleolysis or thermolysis, thoracal                               |
| Discectomy incl. chemonucleolysis | 5803             | 580303          | Chemonucleolyse of thermolaesie, lumbaal                                  | chemonucleolysis or thermolysis, lumbal                                 |
| Discectomy incl. chemonucleolysis | 5803             | 58031           | excisie van discus intervertebralis, cervicaal, anterior                  | Excision of the discus intervertebralis, cervical, anterior             |
| Discectomy incl. chemonucleolysis | 5803             | 58032           | Excisie van discus intervertebralis, cervicaal, lateraal                  | Excision of the discus intervertebralis, cervical, lateral              |
| Discectomy incl. chemonucleolysis | 5803             | 58033           | Excisie van discus intervertebralis, thoracaal                            | Excision of the discus intervertebralis, thoracal                       |
| Discectomy incl. chemonucleolysis | 5803             | 58034           | Excisie van discus intervertebralis, lumbaal                              | Excision of the discus intervertebralis, lumbal                         |
| Discectomy incl. chemonucleolysis | 5803             | 580340          | Excisie van discus intervertebralis, lumbaal, nno                         | Excision of the discus intervertebralis, lumbal, not specified          |
| Discectomy incl. chemonucleolysis | 5803             | 580341          | Excisie van discus intervertebralis, lumbaal m.b.v. endoscopie            | Excision of the discus intervertebralis, lumbal using endoscopy         |
| Discectomy incl. chemonucleolysis | 5803             | 580342          | Excisie van discus intervertebralis, lumbaal, open                        | Excision of the discus intervertebralis, lumbal, open                   |
| Discectomy incl. chemonucleolysis | 5803             | 58035           | Excisie van discus intervertebralis, lumbaal, recidief                    | Excision of the discus intervertebralis, lumbal, relapse                |
| Discectomy incl. chemonucleolysis | 5803             | 58036           | Excisie van overige discus intervertebralis, recidief                     | Excision of other discus intervertebralis, relapse                      |
| Discectomy incl. chemonucleolysis | 5803             | 58037           | Percutane discectomie                                                     | percutaneous discectomy                                                 |
| Discectomy incl. chemonucleolysis | 5803             | 58038           | Overige gespecificeerde excisie en destructie van discus intervertebralis | other specified excision and destruction of the discus intervertebralis |
| Discectomy incl. chemonucleolysis | 5803             | 58039           | Excisie en destructie van discus intervertebralis, niet gespecificeerd    | Excision and destruction of the discus intervertebralis, non-specific   |
| Laminectomy                       | 5030             | 5030            | Exploratie en decompressie van ruggenmergkanaal                           | Exploration and decompression of the spinal canal                       |
| Laminectomy                       | 5030             | 50300           | Laminectomie, cervicaal                                                   | laminectomy, cervical                                                   |
| Laminectomy                       | 5030             | 503000          | Laminectomie, cervicaal, nno                                              | laminectomy, cervical, not specified                                    |
| Laminectomy                       | 5030             | 503001          | Laminectomie, cervicaal, m.b.v. endoscopie                                | laminectomy, cervical, using endoscopy                                  |
| Laminectomy                       | 5030             | 503002          | Laminectomie, cervicaal, open                                             | laminectomy, cervical, open                                             |

|                         |      |        |                                                                                     |                                                                                      |
|-------------------------|------|--------|-------------------------------------------------------------------------------------|--------------------------------------------------------------------------------------|
| Laminectomy             | 5030 | 50301  | Laminectomie, thoracaal                                                             | laminectomy, thoracal                                                                |
| Laminectomy             | 5030 | 503010 | Laminectomie, thoracaal, nno                                                        | laminectomy, thoracal, not specified                                                 |
| Laminectomy             | 5030 | 503011 | Laminectomie, thoracaal, m.b.v. endoscopie                                          | laminectomy, thoracal, using endoscopy                                               |
| Laminectomy             | 5030 | 503012 | Laminectomie, thoracaal, open                                                       | laminectomy, thoracal, open                                                          |
| Laminectomy             | 5030 | 50302  | Laminectomie, lumbaal                                                               | laminectomy, lumbal                                                                  |
| Laminectomy             | 5030 | 503020 | Laminectomie, lumbaal, nno                                                          | laminectomy, lumbal, not specified                                                   |
| Laminectomy             | 5030 | 503021 | Laminectomie, lumbaal, m.b.v. endoscopie                                            | laminectomy, lumbal, using endoscopy                                                 |
| Laminectomy             | 5030 | 503022 | Laminectomie, lumbaal, open                                                         | laminectomy, lumbal, open                                                            |
| Laminectomy             | 5030 | 50303  | Relaminectomie, cervicaal                                                           | relaminectomy, cervical                                                              |
| Laminectomy             | 5030 | 503030 | Relaminectomie, cervicaal, nno                                                      | relaminectomy, cervical, not specified                                               |
| Laminectomy             | 5030 | 503031 | Relaminectomie, cervicaal, m.b.v. endoscopie                                        | relaminectomy, cervical, using endoscopy                                             |
| Laminectomy             | 5030 | 503032 | Relaminectomie, cervicaal, open                                                     | relaminectomy, cervical, open                                                        |
| Laminectomy             | 5030 | 50304  | relaminectomie, thoracaal                                                           | relaminectomy, thoracal                                                              |
| Laminectomy             | 5030 | 503040 | relaminectomie, thoracaal, nno                                                      | relaminectomy, thoracal, not specified                                               |
| Laminectomy             | 5030 | 503041 | relaminectomie, thoracaal, m.b.v. endoscopie                                        | relaminectomy, thoracal, using endoscopy                                             |
| Laminectomy             | 5030 | 503042 | relaminectomie, thoracaal, open                                                     | relaminectomy, thoracal, open                                                        |
| Laminectomy             | 5030 | 50305  | relaminectomie, lumbaal                                                             | relaminectomy, lumbal                                                                |
| Laminectomy             | 5030 | 503050 | relaminectomie, lumbaal, nno                                                        | relaminectomy, lumbal, not specified                                                 |
| Laminectomy             | 5030 | 503051 | relaminectomie, lumbaal, m.b.v. endoscopie                                          | relaminectomy, lumbal, using endoscopy                                               |
| Laminectomy             | 5030 | 503052 | relaminectomie, lumbaal, open                                                       | relaminectomy, lumbal, open                                                          |
| Laminectomy             | 5030 | 50306  | herstel van intraspinale gevolgen van wervelfractuur                                | recovery of intraspinal effects of spinal fracture                                   |
| Laminectomy             | 5030 | 50308  | overige gespecificeerde exploratie en decompressie van ruggenmergkanaal             | other specified exploration and decompression of the spinal canal                    |
| Laminectomy             | 5030 | 50309  | exploratie en decompressie van ruggenmergkanaal, niet gespecificeerd                | exploration and decompression of the spinal canal, non-specific                      |
| Invasive pain treatment | 5031 | 5031   | Incisie, doorsnijden of destructie van intraspinale zenuwwortel of spinaal ganglion | Incision, dissection or destruction of the intraspinal nerve root or spinal ganglion |
| Invasive pain treatment | 5031 | 50310  | percutane thermolaesie van spinaal ganglion                                         | percutaneous thermolysis of the spinal ganglion                                      |
| Invasive pain treatment | 5031 | 503100 | percutane thermolaesie van spinaal ganglion, nno                                    | percutaneous thermolysis of the spinal ganglion, not specified                       |
| Invasive pain treatment | 5031 | 503101 | percutane thermolaesie van spinaal ganglion, cervicaal                              | percutaneous thermolysis of the spinal ganglion, cervical                            |
| Invasive pain treatment | 5031 | 503102 | percutane thermolaesie van spinaal ganglion, thoracaal                              | percutaneous thermolysis of the spinal ganglion, thoracal                            |

|                         |      |        |                                                                                                             |                                                                                                      |
|-------------------------|------|--------|-------------------------------------------------------------------------------------------------------------|------------------------------------------------------------------------------------------------------|
| Invasive pain treatment | 5031 | 503103 | percutane thermolaesie van spinaal ganglion, lumbaal                                                        | percutaneous thermolysis of the spinal ganglion, lumbal                                              |
| Invasive pain treatment | 5031 | 503104 | percutane thermolaesie van spinaal ganglion, sacraal                                                        | percutaneous thermolysis of the spinal ganglion, sacral                                              |
| Invasive pain treatment | 5031 | 50311  | doorsnijden van zenuwwortel                                                                                 | dissection of the nerve root                                                                         |
| Invasive pain treatment | 5031 | 503110 | doorsnijden van zenuwwortel, nno                                                                            | dissection of the nerve root, not specified                                                          |
| Invasive pain treatment | 5031 | 503111 | doorsnijden van zenuwwortel, cervicaal                                                                      | dissection of the nerve root, cervical                                                               |
| Invasive pain treatment | 5031 | 503112 | doorsnijden van zenuwwortel, thoracaal                                                                      | dissection of the nerve root, thoracal                                                               |
| Invasive pain treatment | 5031 | 503113 | doorsnijden van zenuwwortel, lumbaal                                                                        | dissection of the nerve root, lumbal                                                                 |
| Invasive pain treatment | 5031 | 50318  | overige gespecificeerde incisie, doorsnijden of destructie van intraspinale zenuwwortel of spinaal ganglion | other specified incision, dissection or destruction of the intraspinal nerve root or spinal ganglion |
| Invasive pain treatment | 5031 | 50319  | incisie, doorsnijden of destructie van intraspinale zenuwwortel of spinaal ganglion, niet gespecificeerd    | incision, dissection or destruction of the intraspinal nerve root or spinal ganglion, non-specific   |
| Invasive pain treatment | 5035 | 5035   | Losmaken van adhesies van ruggenmerg en zenuwwortels                                                        | Disconnection of the adhesions of the spinal cord and nerve roots                                    |
| Invasive pain treatment | 5035 | 50350  | adhesiolyse van ruggenmerg en zenuwwortels m.b.v. epidurale catheter                                        | adhesiolysis of the spinal cord and nerve roots using epidural catheter                              |
| Invasive pain treatment | 5035 | 50358  | overig gespecificeerd losmaken van adhesies van ruggenmerg en zenuwwortels                                  | other specified disconnection of the adhesions of the spinal cord and nerve roots                    |
| Invasive pain treatment | 5035 | 50359  | losmaken van adhesies van ruggenmerg en zenuwwortels, niet gespecificeerd                                   | Disconnection of the adhesions of the spinal cord and nerve roots, non-specific                      |
| Invasive pain treatment | 5037 | 5037   | Injectie van destructieve stof binnen wervelkolom                                                           | Injection of destructive substance in vertebral column                                               |
| Invasive pain treatment | 5037 | 50370  | No description                                                                                              | No description                                                                                       |
| Invasive pain treatment | 5037 | 50371  | injectie van destructieve stof, epiduraal                                                                   | Injection of destructive substance, epidural                                                         |
| Invasive pain treatment | 5037 | 503710 | injectie van destructieve stof, epiduraal, nno                                                              | Injection of destructive substance, epidural, not specified                                          |
| Invasive pain treatment | 5037 | 503711 | injectie van destructieve stof, epiduraal, cervicaal                                                        | Injection of destructive substance, epidural, cervical                                               |
| Invasive pain treatment | 5037 | 503712 | injectie van destructieve stof, epiduraal, thoracaal                                                        | Injection of destructive substance, epidural, thoracal                                               |
| Invasive pain treatment | 5037 | 503713 | injectie van destructieve stof, epiduraal, lumbaal                                                          | Injection of destructive substance, epidural, lumbal                                                 |
| Invasive pain treatment | 5037 | 503714 | injectie van destructieve stof, epiduraal, sacraal                                                          | Injection of destructive substance, epidural, sacral                                                 |

|                         |      |        |                                                                                     |                                                                                           |
|-------------------------|------|--------|-------------------------------------------------------------------------------------|-------------------------------------------------------------------------------------------|
| Invasive pain treatment | 5037 | 50372  | injectie van destructieve stof, subarachnoïdaal                                     | Injection of destructive substance, subarachnoidal                                        |
| Invasive pain treatment | 5037 | 50378  | overige gespecificeerde injectie van destructieve stof binnen wervelkolom           | other specified injection of destructive substance in vertebral column                    |
| Invasive pain treatment | 5037 | 50379  | injectie van destructieve stof binnen wervelkolom, niet gespecificeerd              | Injection of the destructive substance in vertebral column, non-specific                  |
| Invasive pain treatment | 5038 | 5038   | Aanleggen, revisie en opheffen epidurale en subarachnoïdale blokkade met catheter   | Construction, revision and remove epidural and subarachnoidal blockage with catheter      |
| Invasive pain treatment | 5038 | 50380  | aanleggen van epidurale blokkade met niet gespecificeerde catheter                  | Construction of the epidural blockage with non-specified catheter                         |
| Invasive pain treatment | 5038 | 503800 | aanleggen van epidurale blokkade met niet gespecificeerde catheter, lokalisatie nno | Construction of the epidural blockage with non-specified catheter, location not specified |
| Invasive pain treatment | 5038 | 503801 | aanleggen van epidurale blokkade met niet gespecificeerde catheter, cervicaal       | Construction of the epidural blockage with non-specified catheter, cervical               |
| Invasive pain treatment | 5038 | 503802 | aanleggen van epidurale blokkade met niet gespecificeerde catheter, thoracaal       | Construction of the epidural blockage with non-specified catheter, thoracal               |
| Invasive pain treatment | 5038 | 503803 | aanleggen van epidurale blokkade met niet gespecificeerde catheter, lumbaal         | Construction of the epidural blockage with non-specified catheter, lumbal                 |
| Invasive pain treatment | 5038 | 503804 | aanleggen van epidurale blokkade met niet gespecificeerde catheter, sacraal         | Construction of the epidural blockage with non-specified catheter, sacral                 |
| Invasive pain treatment | 5038 | 50381  | aanleggen van epidurale blokkade met ongetunnelde catheter                          | Construction of the epidural blockage with untunnelled catheter                           |
| Invasive pain treatment | 5038 | 503810 | aanleggen van epidurale blokkade met ongetunnelde catheter, lokalisatie nno         | Construction of the epidural blockage with untunnelled catheter, non-specified location   |
| Invasive pain treatment | 5038 | 503811 | aanleggen van epidurale blokkade met ongetunnelde catheter, cervicaal               | Construction of the epidural blockage with untunnelled catheter, cervical                 |
| Invasive pain treatment | 5038 | 503812 | aanleggen van epidurale blokkade met ongetunnelde catheter, thoracaal               | Construction of the epidural blockage with untunnelled catheter, thoracal                 |
| Invasive pain treatment | 5038 | 503813 | aanleggen van epidurale blokkade met ongetunnelde catheter, lumbaal                 | Construction of the epidural blockage with untunnelled catheter, lumbal                   |
| Invasive pain treatment | 5038 | 503814 | aanleggen van epidurale blokkade met ongetunnelde catheter, sacraal                 | Construction of the epidural blockage with untunnelled catheter, sacral                   |
| Invasive pain treatment | 5038 | 50382  | aanleggen van epidurale blokkade met getunnelde catheter                            | Construction of the epidural blockage with tunnelled catheter                             |
| Invasive pain treatment | 5038 | 503820 | aanleggen van epidurale blokkade met getunnelde catheter, lokalisatie nno           | Construction of the epidural blockage with tunnelled catheter, non-specified location     |

|                         |      |        |                                                                                           |                                                                                               |
|-------------------------|------|--------|-------------------------------------------------------------------------------------------|-----------------------------------------------------------------------------------------------|
| Invasive pain treatment | 5038 | 503821 | aanleggen van epidurale blokkade met getunnelde catheter zonder poortsysteem, cervicaal   | Construction of the epidural blockage with tunnelled catheter without gate system, cervical   |
| Invasive pain treatment | 5038 | 503822 | aanleggen van epidurale blokkade met getunnelde catheter met poortsys-teem, cervicaal     | Construction of the epidural blockage with tunnelled catheter with gate system, cervical      |
| Invasive pain treatment | 5038 | 503823 | aanleggen van epidurale blokkade met getunnelde catheter zonder poortsysteem, thoracaal   | Construction of the epidural blockage with tunnelled catheter without gate system, thoracal   |
| Invasive pain treatment | 5038 | 503824 | aanleggen van epidurale blokkade met getunnelde catheter met poortsys-teem, thoracaal     | Construction of the epidural blockage with tunnelled catheter with gate system, thoracal      |
| Invasive pain treatment | 5038 | 503825 | aanleggen van epidurale blokkade met getunnelde catheter zonder poortsysteem, lumbaal     | Construction of the epidural blockage with tunnelled catheter without gate system, lumbal     |
| Invasive pain treatment | 5038 | 503826 | aanleggen van epidurale blokkade met getunnelde catheter met poortsys-teem, lumbaal       | Construction of the epidural blockage with tunnelled catheter with gate system, lumbal        |
| Invasive pain treatment | 5038 | 503827 | aanleggen van epidurale blokkade met getunnelde catheter zonder poortsysteem, sacraal     | Construction of the epidural blockage with tunnelled catheter without gate system, sacral     |
| Invasive pain treatment | 5038 | 503828 | aanleggen van epidurale blokkade met getunnelde catheter met poortsys-teem, sacraal       | Construction of the epidural blockage with tunnelled catheter with gate system, sacral        |
| Invasive pain treatment | 5038 | 50383  | aanleggen van subarachnoïdale blokkade, lumbaal                                           | Construction of the subarachnoidal blockage, lumbal                                           |
| Invasive pain treatment | 5038 | 503830 | aanleggen van subarachnoïdale blokkade, lumbaal, nno                                      | Construction of the subarachnoidal blockage, lumbal, not specified                            |
| Invasive pain treatment | 5038 | 503831 | aanleggen van subarachnoïdale blokkade, lumbaal, met ongetunnelde catheter                | Construction of the subarachnoidal blockage, lumbal, with untunnelled catheter                |
| Invasive pain treatment | 5038 | 503832 | aanleggen van subarachnoïdale blokkade, lumbaal, met getunnelde catheter                  | Construction of the subarachnoidal blockage, lumbal, with tunnelled catheter                  |
| Invasive pain treatment | 5038 | 503833 | aanleggen van subarachnoïdale blokkade, lumbaal, met getunnelde catheter met poortsysteem | Construction of the subarachnoidal blockage, lumbal, with tunnelled catheter with gate system |

|                         |      |        |                                                                            |                                                                                         |
|-------------------------|------|--------|----------------------------------------------------------------------------|-----------------------------------------------------------------------------------------|
| Invasive pain treatment | 5038 | 50384  | vervangen van epiduraal- en subarachnoïdaal catheter t.b.v. blokkade       | Replacement of the epidural- and subarachnoidal catheter for the purpose of blockade    |
| Invasive pain treatment | 5038 | 50385  | overige revisie van epiduraal- en subarachnoïdaal catheter t.b.v. blokkade | Other revision of the epidural- and subarachnoidal catheter for the purpose of blockade |
| Invasive pain treatment | 5038 | 50386  | verwijderen van epiduraal- en subarachnoïdaal catheter t.b.v. blokkade     | Removing epidural- and subarachnoïdaal catheter for the purpose of blockade             |
| Invasive pain treatment | 5039 | 5039   | Overige operaties van ruggenmerg en ruggenmergstructuren                   | Other surgeries of the spinal cord and spinal cord structures                           |
| Invasive pain treatment | 5039 | 50390  | inbrengen, revisie of verwijderen van ruggenmergstimulator                 | Insertion, revision or removing of the spinal cord stimulator                           |
| Invasive pain treatment | 5039 | 503900 | inbrengen van ruggenmergstimulator, nno                                    | Insertion of the spinal cord stimulator, not specified                                  |
| Invasive pain treatment | 5039 | 503901 | inbrengen van ruggenmergstimulator, cervicaal                              | Insertion of the spinal cord stimulator, cervical                                       |
| Invasive pain treatment | 5039 | 503902 | inbrengen van ruggenmergstimulator, thoracaal                              | Insertion of the spinal cord stimulator, thoracal                                       |
| Invasive pain treatment | 5039 | 503903 | inbrengen van ruggenmergstimulator, lumbaal                                | Insertion of the spinal cord stimulator, lumbal                                         |
| Invasive pain treatment | 5039 | 503904 | vervangen van ruggenmergstimulator, nno                                    | Replacement of the spinal cord stimulator, not specified                                |
| Invasive pain treatment | 5039 | 503905 | vervangen van ruggenmergstimulator, cervicaal                              | Replacement of the spinal cord stimulator, cervical                                     |
| Invasive pain treatment | 5039 | 503906 | vervangen van ruggenmergstimulator, thoracaal                              | Replacement of the spinal cord stimulator, thoracal                                     |
| Invasive pain treatment | 5039 | 503907 | vervangen van ruggenmergstimulator, lumbaal                                | Replacement of the spinal cord stimulator, lumbal                                       |
| Invasive pain treatment | 5039 | 503908 | overige revisie van ruggenmergstimulator                                   | Other revision of the spinal cord stimulator                                            |
| Invasive pain treatment | 5039 | 503909 | verwijderen van ruggenmergstimulator                                       | Removing spinal cord stimulator                                                         |
| Invasive pain treatment | 5039 | 50391  | revisie of verwijderen van shunt van theca spinalis                        | Revision or removing the shunt of the theca spinalis                                    |
| Invasive pain treatment | 5039 | 50398  | overige gespecificeerde operaties van ruggenmerg en ruggenmergstructuren   | other specified surgeries of the spinal cord and spinal cord structures                 |
| Invasive pain treatment | 5039 | 50399  | operaties van ruggenmerg en ruggenmergstructuren, niet gespecificeerd      | surgeries of the spinal cord and spinal cord structures, non-specific                   |
| Spondylodesis           | 5810 | 5810   | Spondylodese                                                               | Spondylodesis                                                                           |
| Spondylodesis           | 5810 | 58100  | craniocervicale spondylodese                                               | craniocervical spondylodesis                                                            |
| Spondylodesis           | 5810 | 58101  | cervicale spondylodese                                                     | cervical spondylodesis                                                                  |
| Spondylodesis           | 5810 | 581010 | cervicale spondylodese, nno                                                | cervical spondylodesis, not specified                                                   |
| Spondylodesis           | 5810 | 581011 | cervicale spondylodese, anterior                                           | cervical spondylodesis, anterior                                                        |
| Spondylodesis           | 5810 | 581012 | cervicale spondylodese, posterior                                          | cervical spondylodesis, posterior                                                       |
| Spondylodesis           | 5810 | 58102  | thoracale spondylodese                                                     | thoracal spondylodesis                                                                  |
| Spondylodesis           | 5810 | 581020 | thoracale spondylodese, nno                                                | thoracal spondylodesis, not specified                                                   |

|               |      |        |                                                     |                                                   |
|---------------|------|--------|-----------------------------------------------------|---------------------------------------------------|
| Spondylodesis | 5810 | 581021 | thoracale spondylodese, anterior, nno               | thoracal spondylodesis, anterior, not specified   |
| Spondylodesis | 5810 | 581022 | thoracale spondylodese, posterolateraal             | thoracal spondylodesis, postero-lateral           |
| Spondylodesis | 5810 | 581023 | thoracale spondylodese, posterior                   | thoracal spondylodesis, posterior                 |
| Spondylodesis | 5810 | 581024 | thoracale spondylodese, anterior, m.b.v. endoscopie | thoracal spondylodesis, anterior, using endoscopy |
| Spondylodesis | 5810 | 581025 | thoracale spondylodese, anterior, open              | thoracal spondylodesis, anterior, open            |
| Spondylodesis | 5810 | 58103  | lumbale spondylodese                                | lumbal spondylodesis                              |
| Spondylodesis | 5810 | 581030 | lumbale spondylodese, nno                           | lumbal spondylodesis, not specified               |
| Spondylodesis | 5810 | 581031 | lumbale spondylodese, anterior, nno                 | lumbal spondylodesis, anterior, not specified     |
| Spondylodesis | 5810 | 581032 | lumbale spondylodese, posterolateraal               | lumbal spondylodesis, postero-lateral             |
| Spondylodesis | 5810 | 581034 | lumbale spondylodese, posterior                     | lumbal spondylodesis, posterior                   |
| Spondylodesis | 5810 | 581035 | lumbale spondylodese, anterior, m.b.v. endoscopie   | lumbal spondylodesis, anterior, using endoscopy   |
| Spondylodesis | 5810 | 581036 | lumbale spondylodese, anterior, open                | lumbal spondylodesis, anterior, open              |
| Spondylodesis | 5810 | 58104  | respondylodese                                      | respondylodesis                                   |
| Spondylodesis | 5810 | 58108  | overige spondylodese                                | other spondylodesis                               |
| Spondylodesis | 5810 | 58109  | spondylodese, niet gespecificeerd                   | spondylodesis, non-specific                       |
